# Supplementary material for: Association of Short-Term Exposure to Meteorological Factors and Risk of Hand, Foot, and Mouth Disease: A Systematic Review and Meta-Analysis
Source: PubMed Central journal article supplement (PMC7663009; doi:10.3390/ijerph17218017), 2020-10-30
Supplement: ijerph-17-08017-s001.pdf [file ijerph-17-08017-s001.pdf]

**Table S1.** The quality of articles assessed by Newcastle Ottawa Scale (NOS).

| First author. (Year)  | Quality assessment (NOS) |               |         | Total score |
|-----------------------|--------------------------|---------------|---------|-------------|
|                       | Selection                | Comparability | Outcome |             |
| Zhu et al. (2015)     | 3                        | 2             | 3       | 8           |
| Chen et al. (2014)    | 3                        | 2             | 2       | 7           |
| Yang et al. (2018)    | 3                        | 2             | 3       | 8           |
| Xu et al. (2015)      | 3                        | 2             | 2       | 7           |
| Yu et al. (2018)      | 3                        | 2             | 2       | 7           |
| Zhang et al. (2018)   | 3                        | 1             | 2       | 6           |
| Qi et al. (2018)      | 3                        | 2             | 3       | 8           |
| Zhu et al. (2016)     | 4                        | 2             | 3       | 9           |
| Bo et al. (2020)      | 4                        | 2             | 3       | 9           |
| Wang et al. (2016)    | 3                        | 2             | 2       | 7           |
| Yin et al. (2016)     | 3                        | 2             | 2       | 7           |
| Guo et al. (2016)     | 3                        | 2             | 2       | 7           |
| Hao et al. (2020)     | 3                        | 2             | 2       | 7           |
| Xuan et al. (2017)    | 3                        | 2             | 2       | 7           |
| Gou et al. (2018)     | 3                        | 1             | 2       | 6           |
| Onozuka et al. (2011) | 3                        | 1             | 3       | 7           |
| Hii et al. (2011)     | 4                        | 1             | 3       | 8           |
| Tian et al. (2018)    | 3                        | 2             | 2       | 7           |
| Kim et al. (2016)     | 4                        | 2             | 2       | 8           |
| Wang et al. (2019)    | 4                        | 1             | 2       | 7           |
| Xuan et al. (2019)    | 4                        | 2             | 2       | 8           |
| Xu et al. (2019)      | 4                        | 1             | 2       | 7           |
| Yang et al. (2015)    | 3                        | 2             | 2       | 7           |
| Zhu et al. (2019)     | 3                        | 2             | 2       | 7           |
| Li et al. (2014)      | 3                        | 1             | 2       | 6           |
| Zhu et al. (2020)     | 3                        | 1             | 3       | 7           |
| Ji et al. (2020)      | 3                        | 2             | 3       | 8           |
| Gou et al. (2020)     | 3                        | 1             | 2       | 6           |

**Table S2.** Subgroup analysis for the increased HFMD risk associated with ambient temperature and relative humidity based on cumulative lag models.

| Subgroup types          | Ambient temperature |                           |                     | Relative humidity |                           |                     |
|-------------------------|---------------------|---------------------------|---------------------|-------------------|---------------------------|---------------------|
|                         | n                   | I <sup>2</sup> %, p-value | Pooled RR (95% CI)  | n                 | I <sup>2</sup> %, p-value | Pooled RR (95%CI)   |
| <b>Measure</b>          |                     |                           |                     |                   |                           |                     |
| Mean                    | 5                   | 90.3%, p = 0.000          | 1.473 (1.147-1.892) | 4                 | 54.7%, p = 0.085          | 1.154 (1.053-1.264) |
| Maximum                 | 8                   | 95.5%, p = 0.000          | 2.660 (2.028-3.488) | 3                 | 90.2%, p = 0.000          | 1.406 (0.996-1.985) |
| Minimum                 | 5                   | 84.6%, p = 0.000          | 1.443 (1.092-1.906) | 3                 | 91.1%, p = 0.000          | 1.042 (0.740-1.468) |
| <b>Regional climate</b> |                     |                           |                     |                   |                           |                     |
| Tropical                | 1                   |                           | 1.420 (0.540-3.732) | 1                 |                           | 2.762 (1.636-4.662) |
| Temperate               | 17                  | 97.2%, p = 0.000          | 1.955 (1.573-2.429) | 7                 | 89.1%, p = 0.000          | 1.110 (0.996-1.237) |

**Table S3.** The overall effect of each meteorological factor on the risk of HFMD (with or without extreme exposure values).

| <b>Variable</b>           | <b>N<sup>1</sup></b> | <b>Pooled RR (95% CI)<sup>1</sup></b> | <b>N<sup>2</sup></b> | <b>Pooled RR (95% CI)<sup>2</sup></b> |
|---------------------------|----------------------|---------------------------------------|----------------------|---------------------------------------|
| <b>Single-day lag</b>     |                      |                                       |                      |                                       |
| ambient temperature       | 23                   | 1.105 (1.078- 1.133)                  | 15                   | 1.060 (1.033-1.088)                   |
| relative humidity         | 23                   | 1.014 (1.009-1.018)                   | 13                   | 1.016 (1.012-1.021)                   |
| rainfall                  | 12                   | 1.001 (1.000-1.001)                   | 10                   | 1.001 (1.000-1.001)                   |
| wind speed                | 7                    | 1.036 (1.013-1.059)                   | 5                    | 1.075 (1.023-1.129)                   |
| sunshine duration         | 5                    | 0.997 (0.975-1.018)                   | 5                    | 0.997 (0.975-1.018)                   |
| <b>Cumulative-day lag</b> |                      |                                       |                      |                                       |
| ambient temperature       | 18                   | 1.937 (1.564-2.400)                   | 5                    | 1.468 (1.206-1.787)                   |
| relative humidity         | 10                   | 1.154 (1.030-1.294)                   | 4                    | 1.154 (1.053-1.264)                   |

<sup>1</sup>: With extreme exposure values included; <sup>2</sup>: With extreme exposure values excluded.

**Table S4.** The differences in the effects of meteorological factors on HFMD between two meta-analyses (Chen et al. (2018) V.S the current study).

| Subgroup types          | Ambient Temperature |                    |                |                      | Relative humidity |                    |                |                      |
|-------------------------|---------------------|--------------------|----------------|----------------------|-------------------|--------------------|----------------|----------------------|
|                         | N <sup>1</sup>      | Pooled RR (95% CI) | N <sup>2</sup> | Pooled RR (95% CI)   | N <sup>1</sup>    | Pooled RR (95% CI) | N <sup>2</sup> | Pooled RR (95% CI)   |
| <b>Measure</b>          |                     |                    |                |                      |                   |                    |                |                      |
| Mean                    | 7                   | 1.05 (1.03–1.08)*  | 15             | 1.060 (1.033-1.088)* |                   |                    | 13             | 1.017 (1.011-1.024)* |
| Maximum                 | 1                   | 1.18 (0.82–1.53)*  | 3              | 1.859 (1.235-2.798)* |                   |                    | 5              | 1.015 (1.005-1.026)* |
| Minimum                 | 1                   | 0.90 (0.76–1.03)*  | 3              | 1.288 (0.896-1.853)  |                   |                    | 4              | 0.899 (0.782-1.034)* |
| <b>Time resolution</b>  |                     |                    |                |                      |                   |                    |                |                      |
| Daily                   | 5                   | 1.02 (1.01–1.03)*  | 7              | 1.048 (1.018-1.079)* | 5                 | 1.01 (1.00–1.01)*  | 15             | 1.009 (1.004-1.014)* |
| Weekly                  | 5                   | 1.07 (1.00–1.13)*  | 12             | 1.121 (1.084-1.161)* | 3                 | 1.02 (0.99–1.06)   | 5              | 1.018 (1.008-1.028)* |
| Monthly                 | 1                   | 1.07 (1.05–1.09)*  | 1              | 1.045 (1.021-1.069)* | 1                 | 1.03 (1.02–1.04)*  | 1              | 1.015 (1.006-1.024)* |
| <b>Regional climate</b> |                     |                    |                |                      |                   |                    |                |                      |
| Tropical                | 3                   | 1.02 (0.89–1.16)   | 1              | 1.017 (1.001-1.033)* | 1                 | 1.03 (1.02–1.04)*  | 3              | 1.004 (0.999-1.009)  |
| Subtropical             | 4                   | 1.06 (1.02–1.10)*  | 7              | 1.137 (1.089-1.188)* | 5                 | 1.01 (1.00–1.01)*  | 15             | 1.014 (1.009-1.018)* |
| Temperate               | 1                   | 1.02 (1.01–1.03)*  | 4              | 1.048 (1.029-1.067)* | 1                 | 1.00 (1.00–1.01)*  | 3              | 1.021 (1.009-1.034)* |
| <b>National income</b>  |                     |                    |                |                      |                   |                    |                |                      |
| High                    | 4                   | 1.04 (0.93–1.15)   | 4              | 1.132 (0.963-1.330)* | 2                 | 1.05 (1.02–1.07)*  | 2              | 1.029 (0.999-1.601)* |
| Middle                  | 5                   | 1.05 (1.02–1.08)*  | 17             | 1.065 (1.047-1.083)* | 5                 | 1.01 (1.01–1.01)*  | 18             | 1.015 (1.009-1.021)* |

<sup>1</sup>: Articles included by Chen et al. (2018); <sup>2</sup>: Later updated articles that were not included in the study of Chen et al. (2018).

**Table S5.** The P values of Begg's and Egger's tests by meteorological factors based on single- and cumulative-day lag models.

| <b>Variable</b>            | <b>Begg's Test</b> | <b>Egger's test</b> |
|----------------------------|--------------------|---------------------|
| <b>Single-day lags</b>     |                    |                     |
| Ambient temperature        | 0.001              | 0.331-              |
| Relative humidity          | 0.032              | 0.013               |
| Rainfall                   | 0.945              | 0.38                |
| Wind speed                 | 0.23               | 0.082               |
| Sunshine duration          | 0.806              | 0.904               |
| <b>Cumulative-day lags</b> |                    |                     |
| Temperature                | 0.405              | 0.343               |
| Relative humidity          | 0.152              | 0.269               |

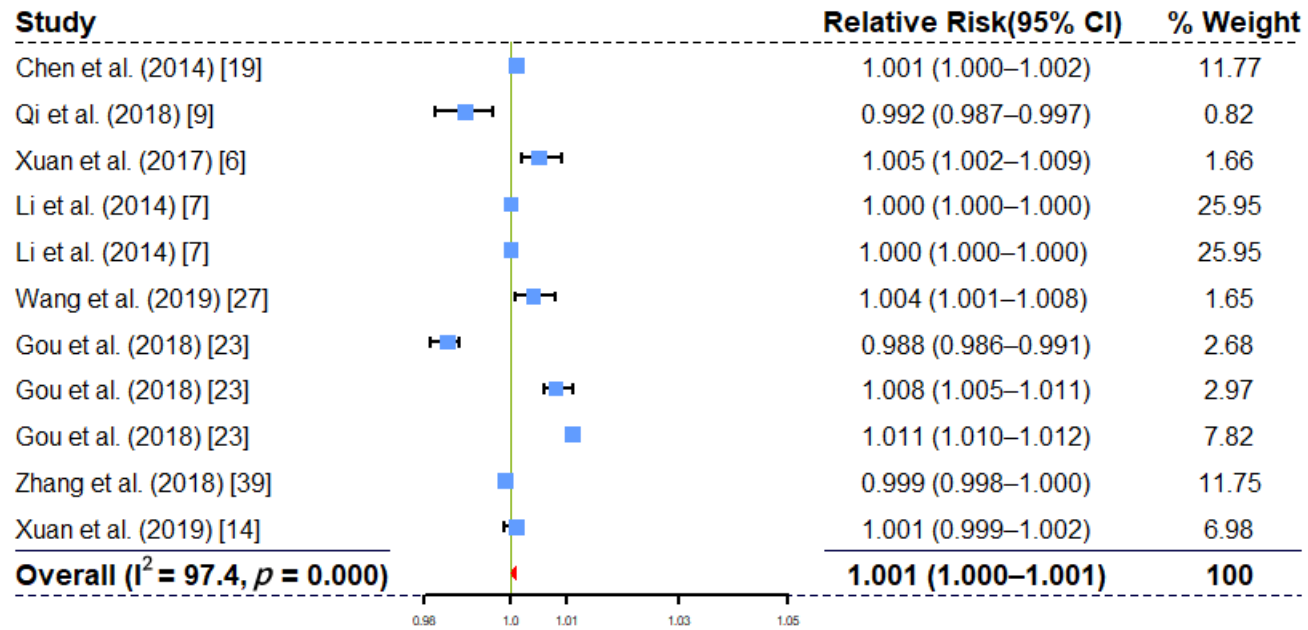

Figure S1. Forest plot showing the effect of rainfall on the risk of HFMD based on single-day lag models (n = 11).

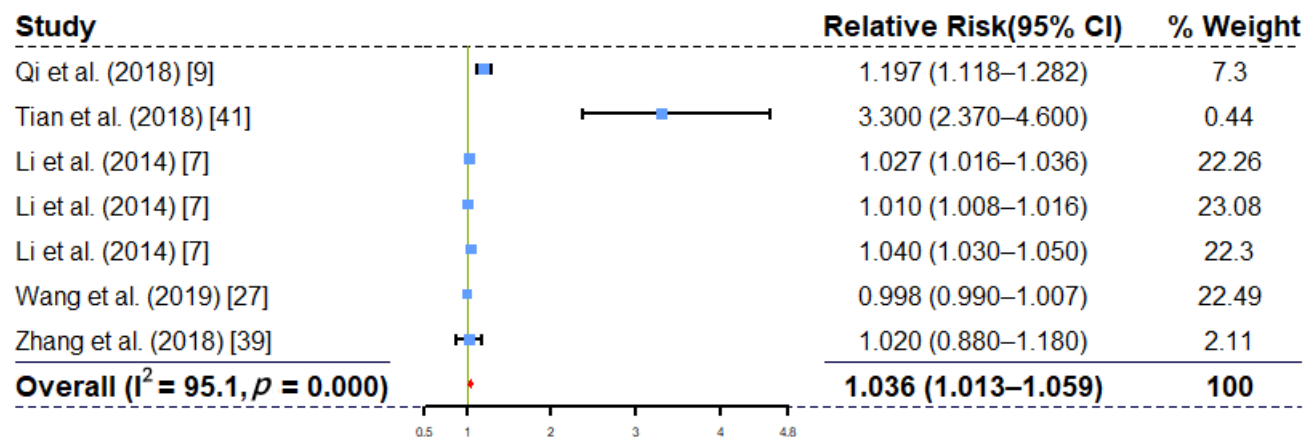

**Figure S2.** Forest plot showing the effect of wind speed on the risk of HFMD based on single-day lag models (n = 7).

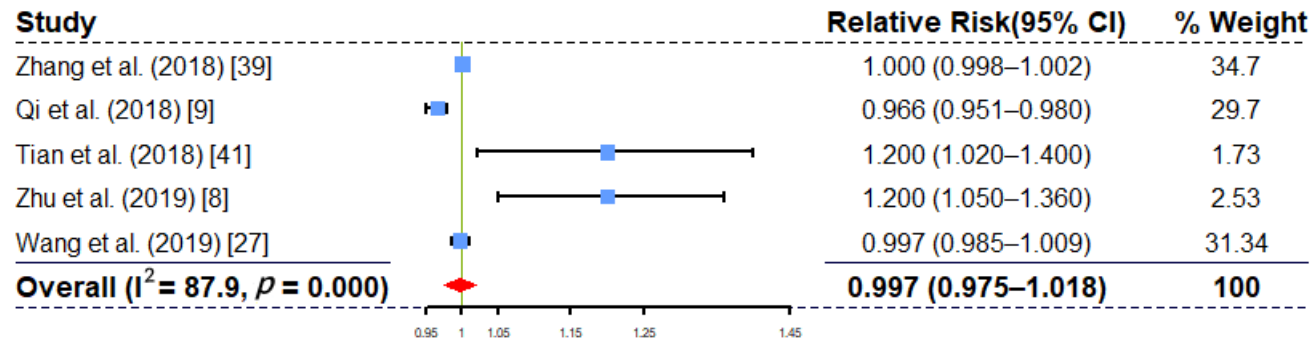

**Figure S3.** Forest plot showing the effect of sunshine duration on the risk of HFMD based on single-day lag models (n = 5).



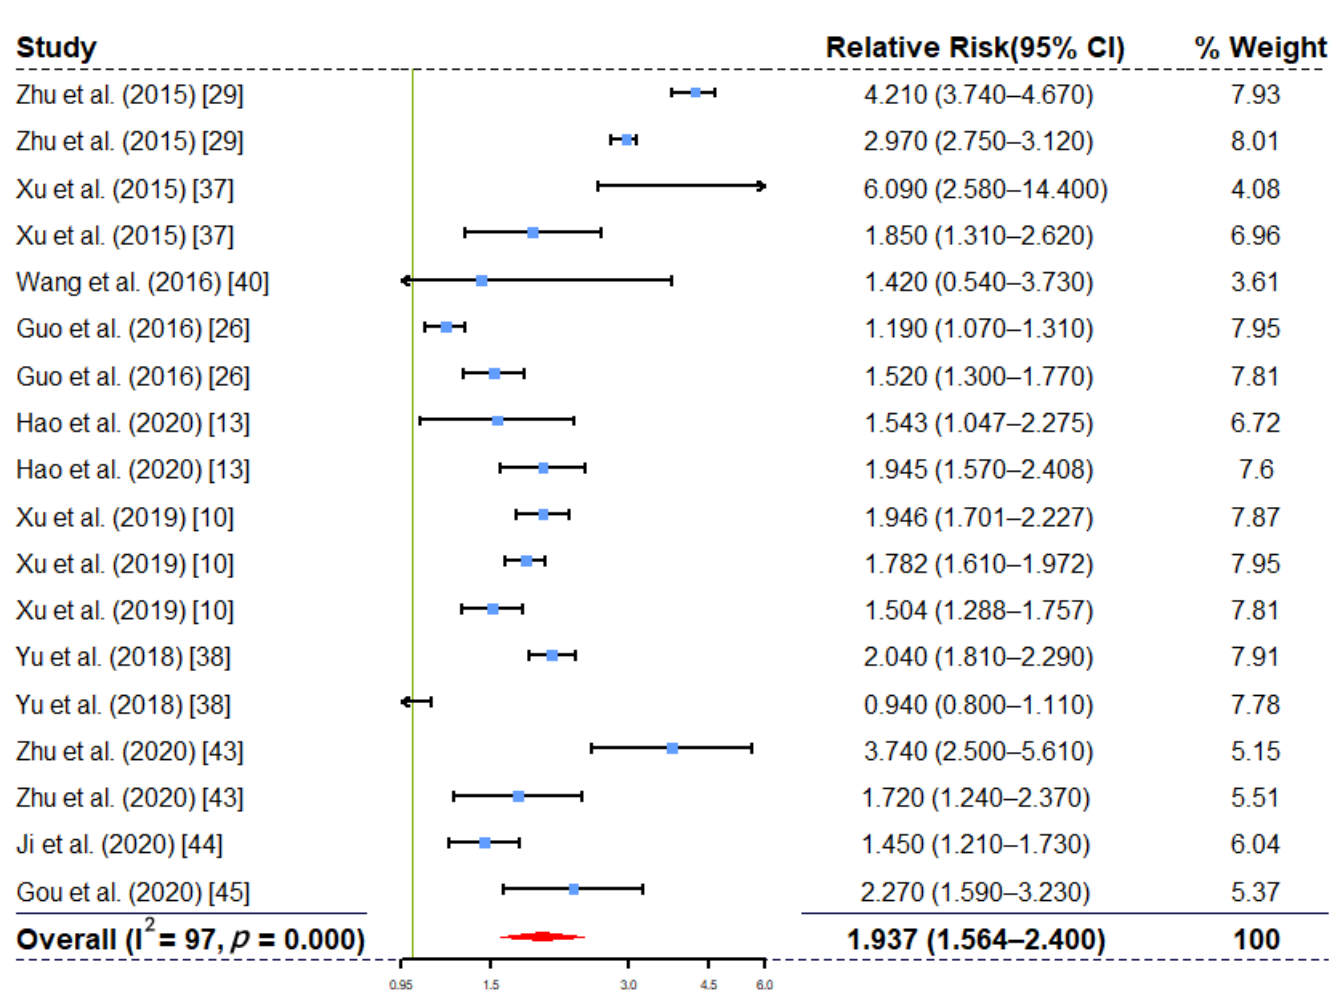

Figure S4. Forest plot showing the effect of ambient temperature on the risk of HFMD based on cumulative-day lag models (n = 18).

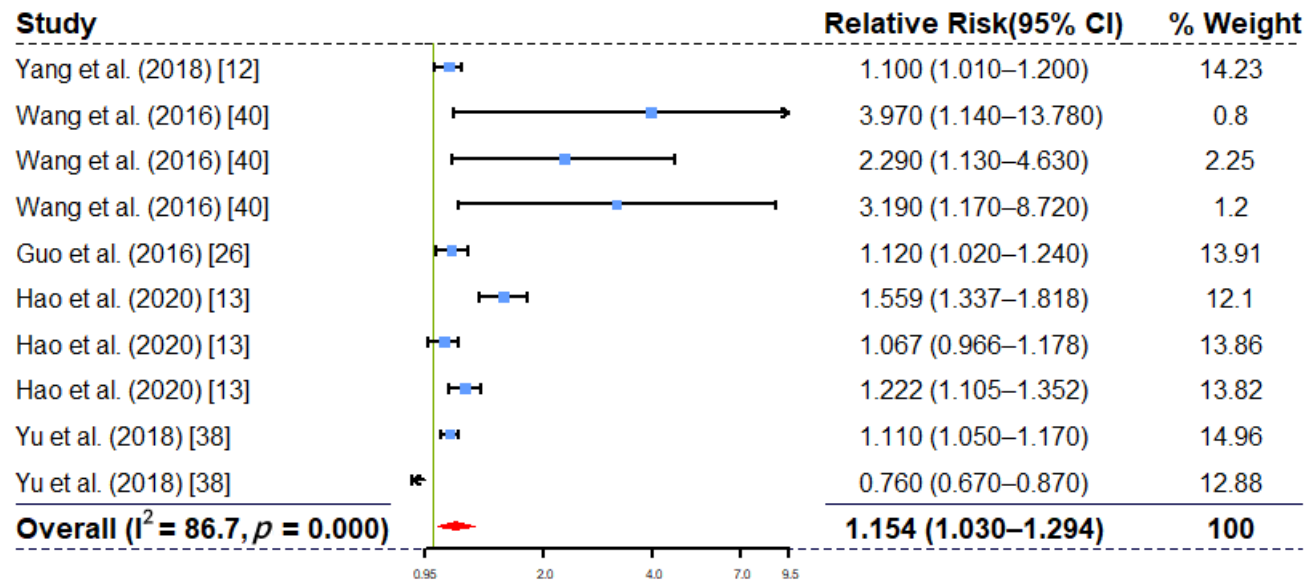

Figure S5. Forest plot showing the effect of relative humidity on the risk of HFMD based on cumulative-day lag models (n = 10).
